# Supplementary material for: Bismuth-induced synthesis of Au–X (X = Pt, Pd) nanoalloys for electrocatalytic reactions
Source: Royal Society of Chemistry journal article supplement (doi:10.1039/d0cc06745h), 2020-12-10
Supplement: d0cc06745h1.pdf [file d0cc06745h1.pdf]

## **Bismuth-induced synthesis of Au-X (X=Pt, Pd) nanoalloys for electrocatalytic reactions**

Nan Wang<sup>a</sup>, Wei Zhao<sup>a</sup>, Miaolei Zhang<sup>a</sup>, Pengfei Cao<sup>a</sup>, Shengjun Sun<sup>b</sup>, Houyi Ma<sup>a,\*</sup>,

Meng Lin<sup>a,\*</sup>

<sup>a</sup> School of Chemistry and Chemical Engineering, Shandong University, Jinan 250100, China.

<sup>b</sup> Shandong Provincial Key Laboratory of Oral Biomedicine, College of Stomatology, Shandong University, Jinan 250021, China.

\*Corresponding authors: mlin@sdu.edu.cn (M. Lin); hyma@sdu.edu.cn (H. Ma).

### **Experimental section**

#### **1. Chemical reagents and instrumentals**

Tetrachloroauric (III) acid hydrate ( $\text{HAuCl}_4 \cdot 4\text{H}_2\text{O}$ ), potassium nitrate ( $\text{KNO}_3$ ), sodium hydroxide ( $\text{NaOH}$ ) and methanol were purchased from the Sinopharm Chemical Reagent Co., Ltd (Shanghai, China). Chloroplatinic acid hexahydrate ( $\text{H}_2\text{PtCl}_6 \cdot 6\text{H}_2\text{O}$ ) and palladium chloride ( $\text{PdCl}_2$ ) were obtained from Aladdin Chemistry Co., Ltd (Shanghai, China). Chemical solvents involved in the experiments are all analytically pure and can be used directly without further purification. Field emission scanning electron microscope (FESEM, Hitachi-SU8010) and SEM-EDS mapping analysis were used to investigate the morphology and structure of the catalysts. UV-vis absorption spectra of the prepared nanoalloys were obtained on the Thermo Evolution 220 ultraviolet-visible spectrometer. X-ray diffraction (XRD) patterns were recorded

on a Rigaku D/Max 2200PC diffractometer using a CuK $\alpha$  source ( $\lambda = 1.541 \text{ \AA}$ , with the applied tube voltage and electric current being 40 kV and 20 mA, respectively). High-angle annular dark-field scanning transmission electron microscopy (HAADF-STEM) and elemental mapping images were acquired by energy-dispersive X-ray spectroscopy (EDS) using a JEOL-2100F electron microscope equipped with a STEM unit. CHI 750E workstation (CH Instrument Company, Shanghai, China) was used for electrochemical measurements.

## 2. Preparation of Au-X nanoalloys

In order to electrochemically deposit Au nanoparticles on the surface of the ITO (1 $\times$ 5 cm) electrode, a series of ITO glasses were immersed in dilute ammonia water (1:3), absolute ethanol and deionized water, sonicated for 5 minutes, respectively. Then the electrode was transferred into an electrolyte which composed of 20.0 mL 0.1 mol L<sup>-1</sup> KNO<sub>3</sub> solution and 0.4 mL 0.024 mol L<sup>-1</sup> HAuCl<sub>4</sub> for the preparation of Au nanoparticles. At room temperature, the electrodeposition was performed by CV in potential range of 0.2 to -1.0 V for 10 cycles, with a scan rate of 50 mV s<sup>-1</sup>. After washing thoroughly with deionized water, the obtained Au nanoparticle modified ITO electrode (Au/ITO) was immersed in an electrolyte of potassium nitrate solution (0.1 mol L<sup>-1</sup>) containing Bi(III) (500  $\mu$ g/L) to fabricate Au-Bi/ITO with a constant voltage of -1.4 V for 400 s. Subsequently, the Au-Bi/ITO was kept into an aqueous solution of 10 mmol/L Pt(IV) or Pd(II) for 12 hours at room temperature. Compared with Bi, the chemical potential of Pt and Pd is higher, and the Bi atoms on the Au-Bi/ITO can be replaced by Pt or Pd atoms through the GRR, resulting in the formation of Au-X (X=Pt,

Pd) modified ITO electrode.

### **3. Electrochemical investigation**

The Au-X modified ITO glass was used as a working electrode, a saturated calomel electrode (SCE) and a graphite rod electrode were used as reference and counter electrodes, respectively. The electrochemical performances of the Au-X modified electrode in the processes of electrochemical HER and MOR were studied by LSV, CV and chronoamperometry, while a 1.0 mol/L NaOH aqueous solution was used as the supporting electrolyte.

### **Results and discussion**

Several peaks present at values between  $46^\circ$  and  $59^\circ$  in the XRD patterns come from the ITO substrate [1]. For Au-Pt and Au-Pd nanoalloys, a peak near  $35^\circ$  can be attributed to  $\text{Bi}_2\text{Pt}$  [2,3] and  $\text{BiPd}$  alloys [4]. After electrocatalysis, a new peak emerged  $37.4^\circ$  which can be associated with the (104) plane of metallic Bi [5]. Meanwhile, some sharp peaks between  $46^\circ$  and  $59^\circ$  present in the Au-X patterns. Except for the characteristic peaks of the ITO substrate (black circles), the remaining peaks can be attributed to Bi-X alloys (black arrow). The  $2\theta=45.16^\circ$ ,  $50.98^\circ$ ,  $55.40^\circ$ ,  $56.37^\circ$  of Au-Pt nanoalloys correspond to the  $\text{BiPt}$  alloy [6], and the presence of  $\text{Bi}_2\text{Pd}$  and/or its oxidation stated are observed at  $45.27^\circ$ ,  $51.02^\circ$ ,  $55.35^\circ$  and  $56.47^\circ$  in the Au-Pd nanoalloy [7]. The structural changes of both nanoalloys can be explained as the partial dissolution, agglomeration and oxidation of nanoparticles during the electrochemical reactions [8-11].

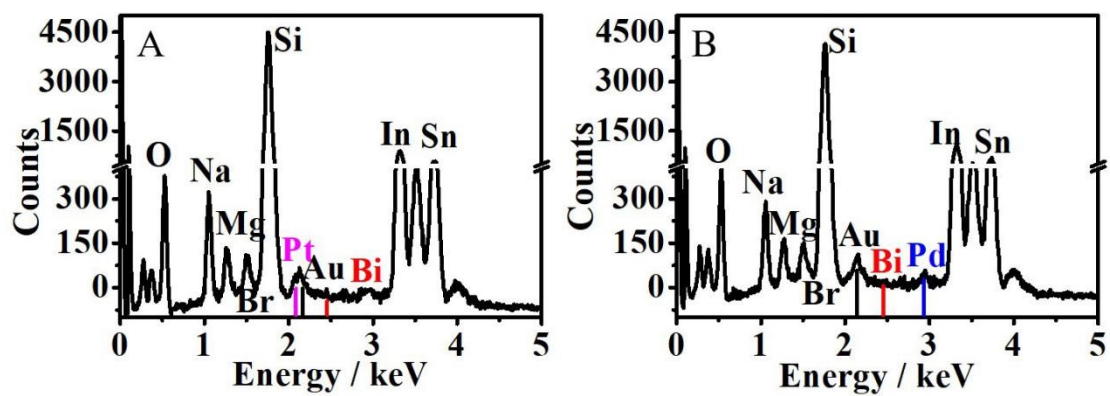

Figure S1. EDS spectra of the Au-Pt/Pd nanoalloys.

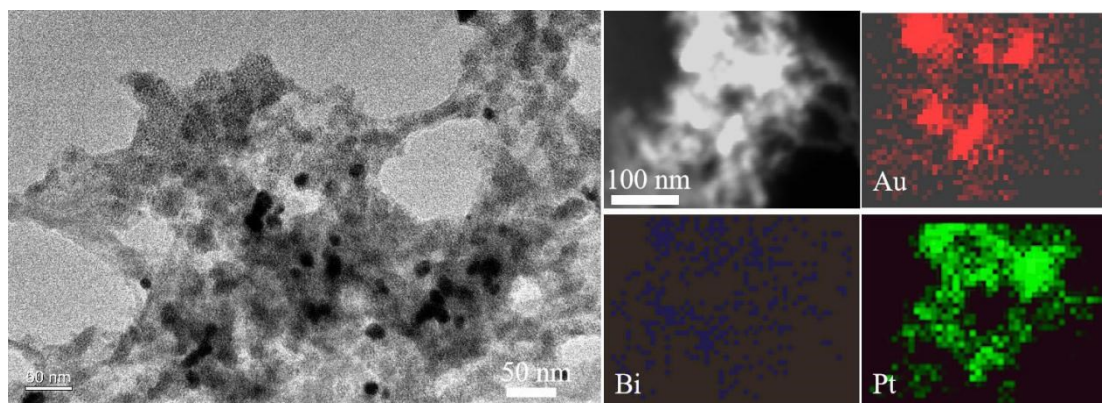

Figure S2. HAADF-STEM image and corresponding elemental mappings of the Au-Pt nanoalloy.

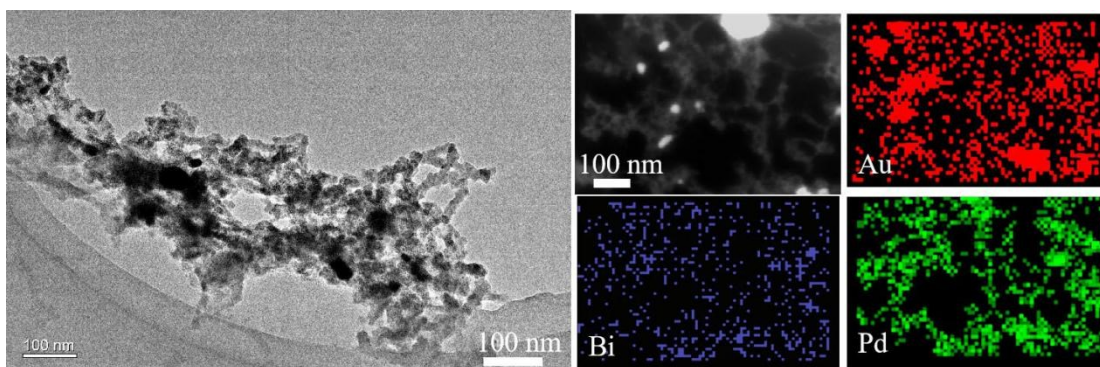

Figure S3. Low-resolution TEM images of the Au-Pd nanoalloy (left image). HAADF-STEM images of the Au-Pd nanoalloy and the corresponding EDS element mapping results (right image).

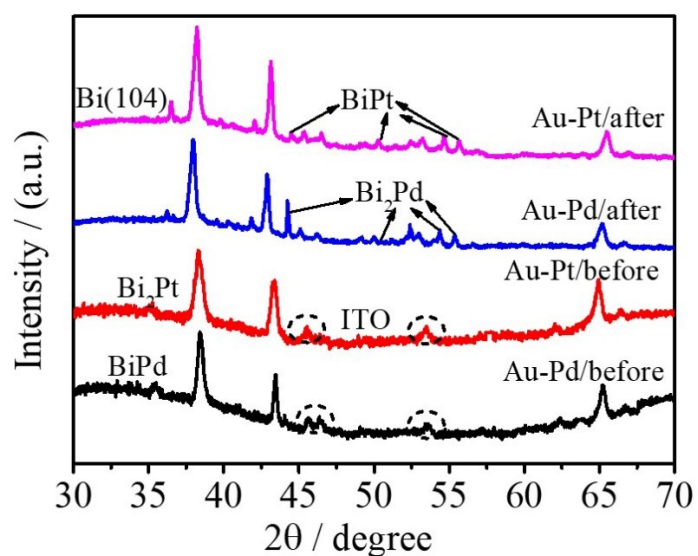

Figure S4. XRD structures of the nanoalloys before and after the electrochemical catalytic reactions.

Table S1. The EDS content distribution of different elements from the Au, Au-Bi, Au-Pt and Au-Pd nanocomposites.

| Element \ Mass Norm[%] | Au   | Bi   | Pd   | Pt   |
|------------------------|------|------|------|------|
| Au                     | 0.69 | -    | -    | -    |
| Au-Bi                  | 0.67 | 0.30 | -    | -    |
| Au-Pt                  | 0.67 | -    | 0.29 | -    |
| Au-Pd                  | 0.65 | -    | -    | 0.23 |

Table S2. HER comparative study of recently reported Au/Pt-based metal electrocatalysts

| Catalyst                              | Electrode | Overpotential@<br>10 mA cm <sup>-2</sup> [mV] | Tafel slope<br>[mV dec <sup>-1</sup> ] | Reference |
|---------------------------------------|-----------|-----------------------------------------------|----------------------------------------|-----------|
| MoS <sub>2</sub> /Au                  | GC        | 330                                           | 57                                     | 12        |
| Pt/Ni(OH) <sub>2</sub>                | CC        | 150                                           |                                        | 13        |
| Ni(OH) <sub>2</sub> /PtO <sub>2</sub> | Ti        | 31.4                                          | 89                                     | 14        |
| Pt/Ni                                 | Ni        | 75                                            | 120                                    | 15        |
| PtO <sub>2</sub> /Co(OH)F             | Ti        | 160                                           | 63                                     | 16        |
| Au-Pt nanoalloy                       | ITO       | 66                                            | 56.53                                  | this work |

Table S3. MOR comparative study of recently reported Pd/Pt-based metal electrocatalysts

| Catalyst                              | Electrolyte                                                        | Peak current from<br>CV curves<br>[mA cm <sup>-2</sup> ] | Reference |
|---------------------------------------|--------------------------------------------------------------------|----------------------------------------------------------|-----------|
| Pd<br>nanoparticles/rGO               | 0.5 M NaOH + 0.5 M<br>CH <sub>3</sub> OH                           | 1.858                                                    | 17        |
| Pt-Pd/rGO                             | 0.5 M H <sub>2</sub> SO <sub>4</sub> + 1.0 M<br>CH <sub>3</sub> OH | 0.36                                                     | 18        |
| Pd-Pt/GO                              | 0.5 M HClO <sub>4</sub> + 1.0 M<br>CH <sub>3</sub> OH              | 4.35                                                     | 19        |
| Pd-Pt alloy/rGO                       | 1.0 M NaOH + 0.5 M<br>CH <sub>3</sub> OH                           | 2.16                                                     | 20        |
| Pd nanoparticles/N-<br>doped graphene | 1.0 M NaOH + 0.5 M<br>CH <sub>3</sub> OH                           | 4.66                                                     | 21        |
| Au-Pd nanoalloy                       | 1.0 M NaOH + 1.0 M<br>CH <sub>3</sub> OH                           | 4.69                                                     | this work |

## References

1. N. Manavizadeh, F. A. Boroumand, E. Asl-Soleimani, F. Raissi, S. Bagherzadeh, A. Khodayari, M. A. Rasouli. *Thin Solid Films*, 2009, **517**, 2324-2327.
2. F. Dawood, B. M. Leonard, R. E. Schaak. *Chem. Mater.* 2007, **19**, 4545-4550.
3. L. Sui, W. An, C. K. Rhee, S. H. Hur. *J. Electrochem. Sci. Technol.*, 2020, **11**, 84-91.
4. T. Shen, S. J. Chen, R. Zeng, M. X. Gong, T. H. Zhao, Y. Lu, X. P. Liu, D. D. Xiao, Y. Yang, J. P. Hu, D. L. Wang, L. Xin, and H. D. Abruña. *ACS Catal.* 2020, **10**, 9977-9985.
5. L. Wang, Z. L. Cui, Z. K. Zhang. *Surf. Coat. Tech.*, 2007, **201**, 5330-5332.
6. M. M. Tusi, N. S. O. Polanco, S. G. da Silva, E. V. Spinacé, A. O. Neto. *Electrochem. Commun.*, 2011, **13**, 143-146.
7. F. Dawood, B. M. Leonard and R. E. Schaak, *Chem. Mater.* 2007, **19**, 4545-4550.
8. Y. Wang. *Nano Energy* 2018, **48**, 590-599.
9. A. Zadick, L. Dubau, N. Sergent, G. Berthomé, M. Chatenet. *ACS Catal.*, 2015, **5**, 4819-4824.
10. D. X. Yu, A. J. Wang, L. L. He, J. Yuan, L. Wu, J. R. Chen, J. J. Feng. *Electrochim. Acta*, 2016, **213**, 565-573.
11. C. H. W. Kelly, T. M. Benedetti, A. Alinezhad, W. Schuhmann, J. J. Gooding, R. D. Tilley. *J. Phys. Chem. C* 2018, **122**, 21718-21723.
12. J. Kim, S. Byun, A. J. Smith, J. Yu, J. Huang, *J. Phys. Chem. Lett.* 2013, **4**, 1227-1232



13. H. Yin, S. Zhao, K. Zhao, A. Muqsit, H. Tang, L. Chang, H. Zhao, Y. Gao, Z. Tang, Nat. Commun. 2015, **6**, 6430
14. L. Xie, X. Ren, Q. Liu, G. Cui, R. Ge, A. M. Asiri, X. Sun, Q. Zhang, L. Chen, J. Mater. Chem. A. 2018, **6**, 1967-1970
15. S. Fiameni, I. Herraiz-Cardona, M. Musiani, V. Pérez-Herranz, L. Vázquez-Gómez, E. Verlato, Int. J. Hydrogen Energy 2012, **37**, 10507-10516
16. Z. Wang, Z. Liu, G. Du, A. M. Asiri, L. Wang, X. Li, H. Wang, X. Sun, L. Chen, Q. Zhang, Chem. Commun. 2018, **54**, 810-813
17. H. Yang, L. Geng, Y. Zhang, G. Chang, Z. Zhang, X. Liu, M. Lei, Y. He, Appl. Surf. Sci., 2019, **466**, 385-392
18. G. V. Reddy, P. Raghavendra, P. S. Chandana and L. S. Sarma, RSC Adv., 2015, **5**, 100522-100530
19. M. Khan, A. B. Yousaf, M. Chen, C. Wei, X. Wu, N. Huang, Z. Qi, L. Li, J. Power Sources, 2015, **282**, 520-528
20. K. Wu, Q. Zhang, D. Sun, X. Zhu, Y. Chen, T. Lu, Y. Tang, Int. J. Hydrogen Energy, 2015, **40**, 6530-6537
21. L. Chao, Y. Qin, J. He, D. Ding, F. Chu, Int. J. Hydrogen Energy, 2017, **42**, 15107-15114.
